# Supplementary material for: Nanotoxicity of 2D Molybdenum Disulfide, MoS2, Nanosheets on Beneficial Soil Bacteria, Bacillus cereus and Pseudomonas aeruginosa
Source: MDPI journal article supplement (doi:10.3390/nano11061453), 2021-05-31
Supplement: s1 [file s1]

## Supplementary Materials

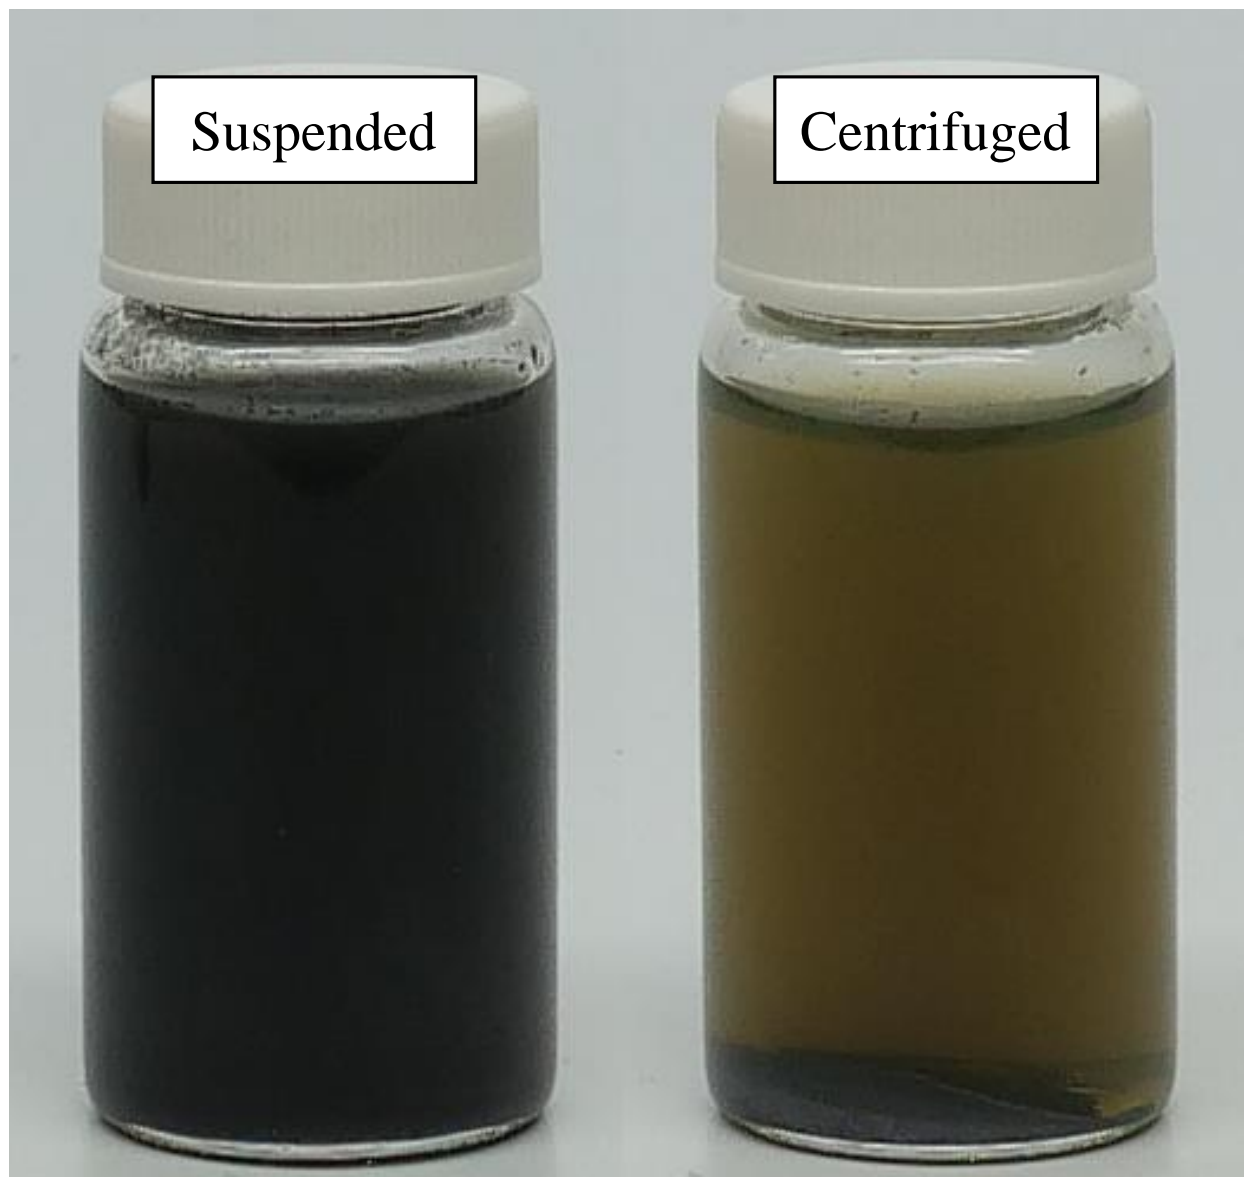

**Figure S1.** Digital photos of exfoliated MoS<sub>2</sub> suspension in water (left) and layered in water after centrifuging 15 minutes for 4,000 rpm (right).

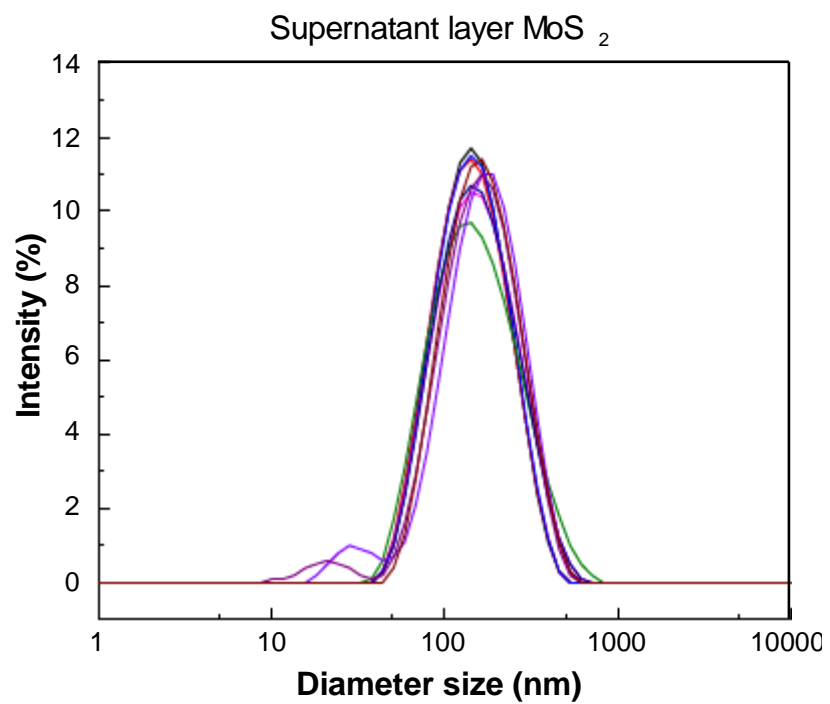

**Figure S2.** The intensity-averaged particle size (hydrodynamics diameter) distribution of supernatant layer (**Figure S2** right image) from centrifuged exfoliated MoS<sub>2</sub> solution (16.0 mg/mL).

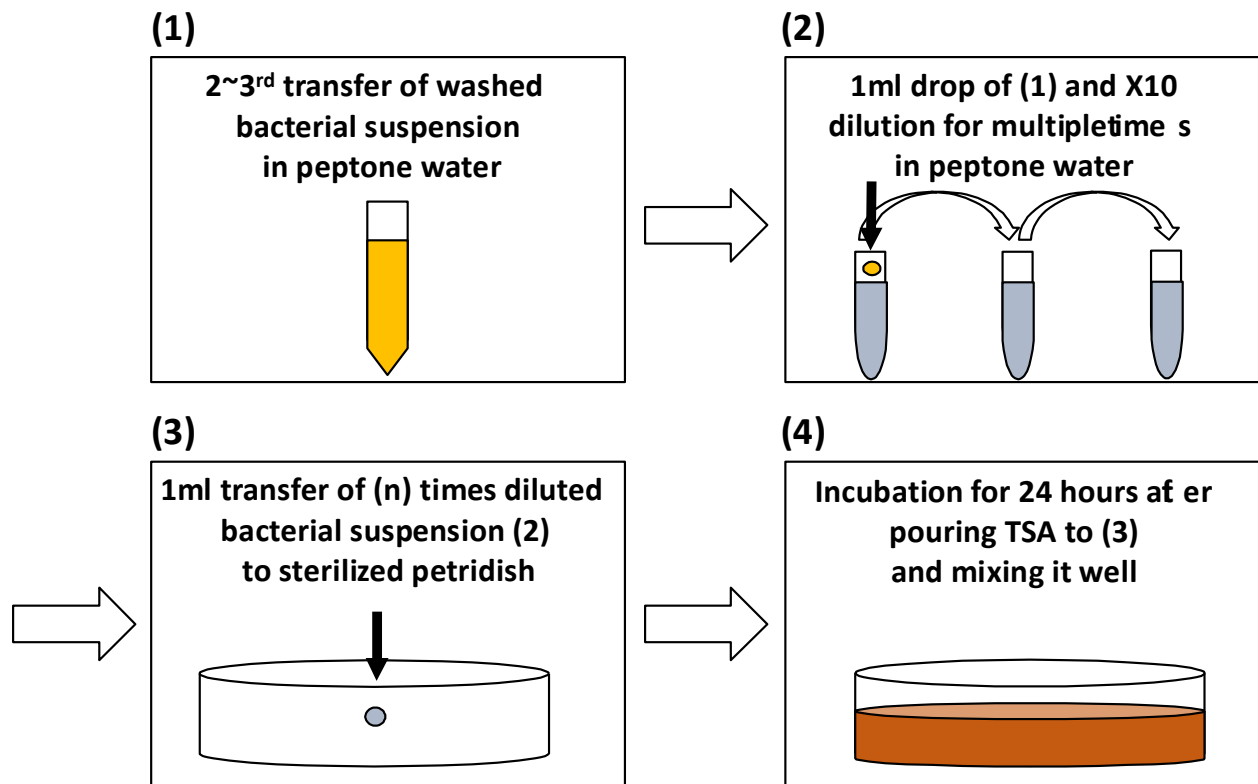

**Figure S3.** Schematic protocol for preparing the sample for the plate counting methodology. After (4), the number of grown colonies (CFU/mL) are counted within range below 200 and will be multiplied with  $10n$  times.

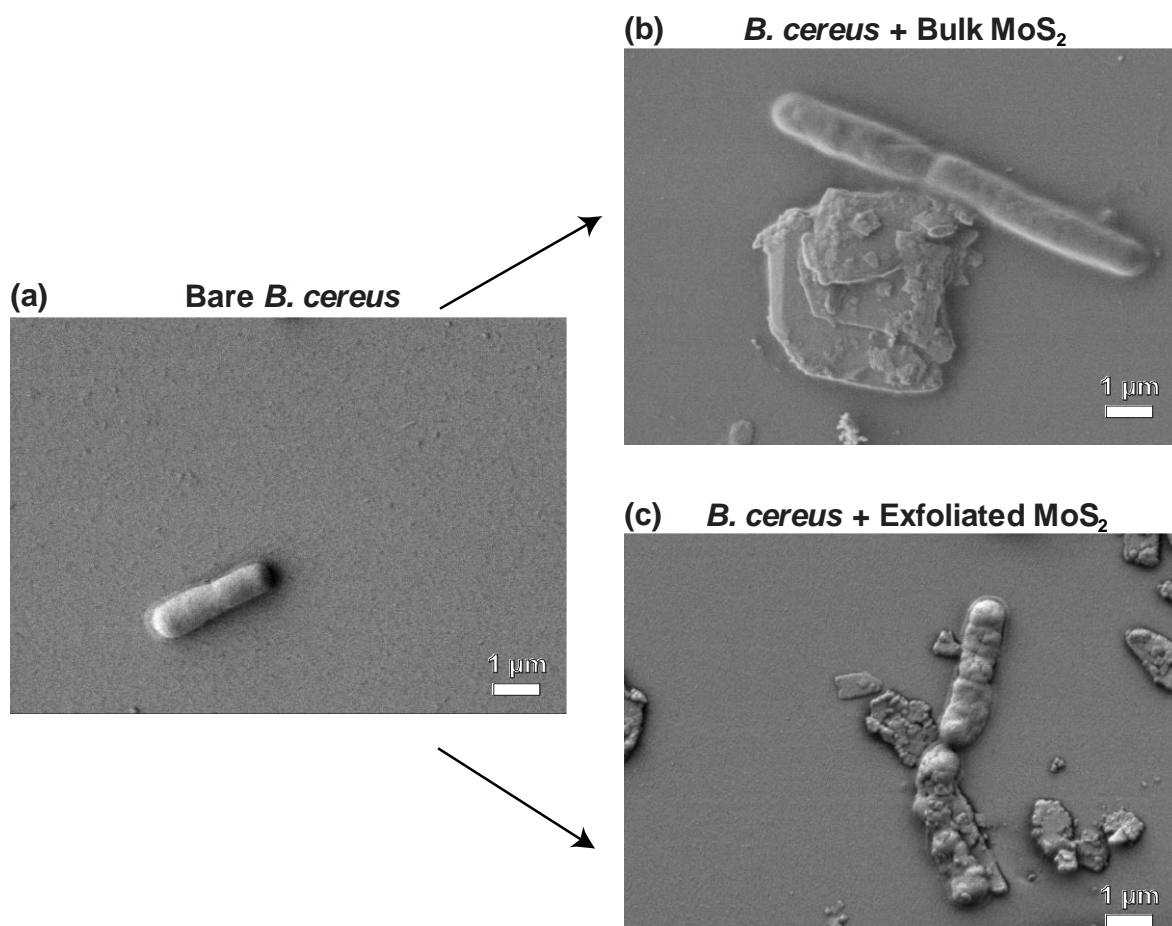

**Figure S4.** More SEM image showing interactions between soil bacteria and  $\text{MoS}_2$  particles (4.0 mg/mL for 12 hours) after they are dried on a silicon wafer surface (a) Bare *Bacillus cereus* (b) *Bacillus cereus* mixed with bulk  $\text{MoS}_2$  (c) *Bacillus cereus* mixed with exfoliated  $\text{MoS}_2$

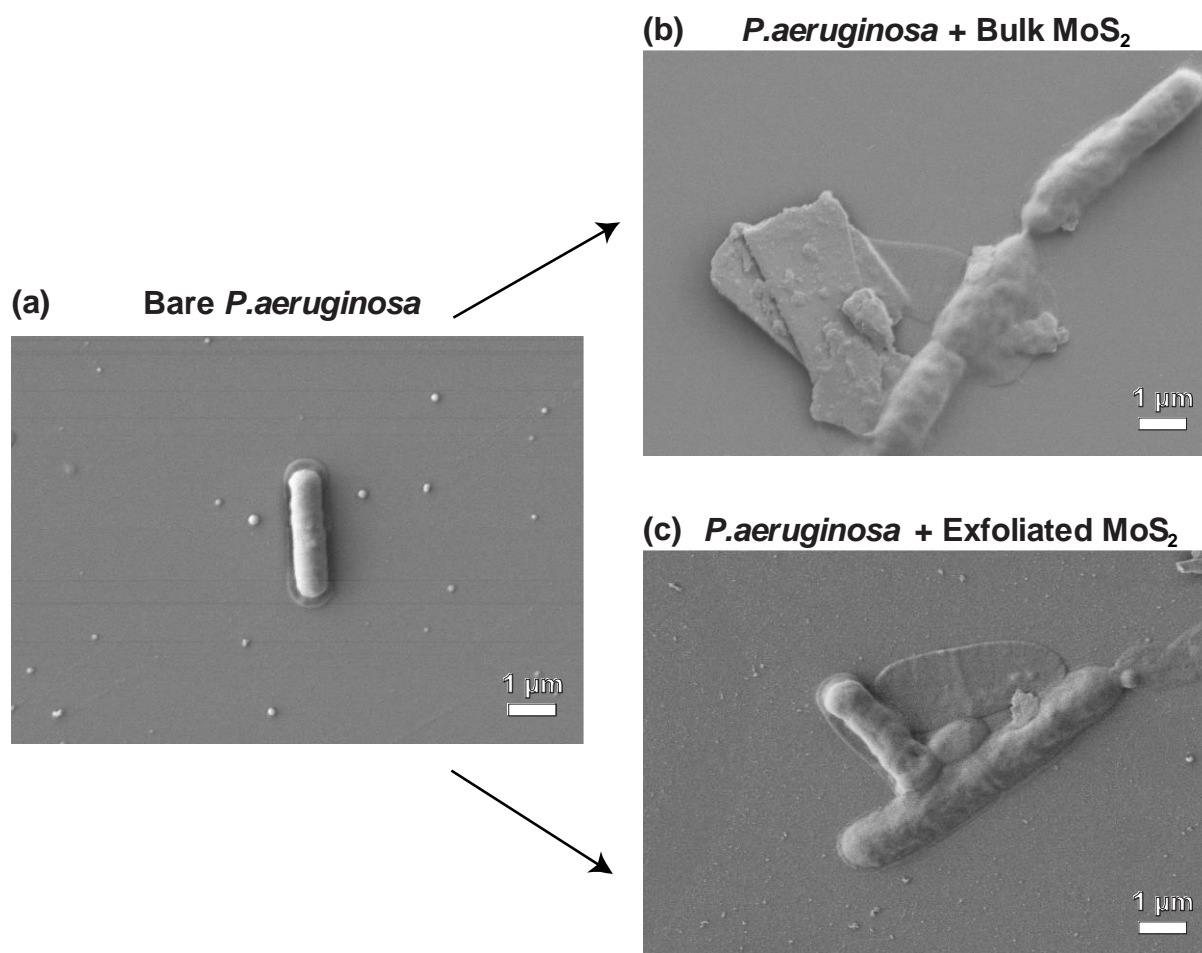

**Figure S5.** More SEM image showing interactions between soil bacteria and MoS<sub>2</sub> particles (4.0 mg/mL for 12 hours) after they are dried on a silicon wafer surface (a) Bare *Pseudomonas aeruginosa* (b) *Pseudomonas aeruginosa* mixed with bulk MoS<sub>2</sub> (c) *Pseudomonas aeruginosa* mixed with exfoliated MoS<sub>2</sub>

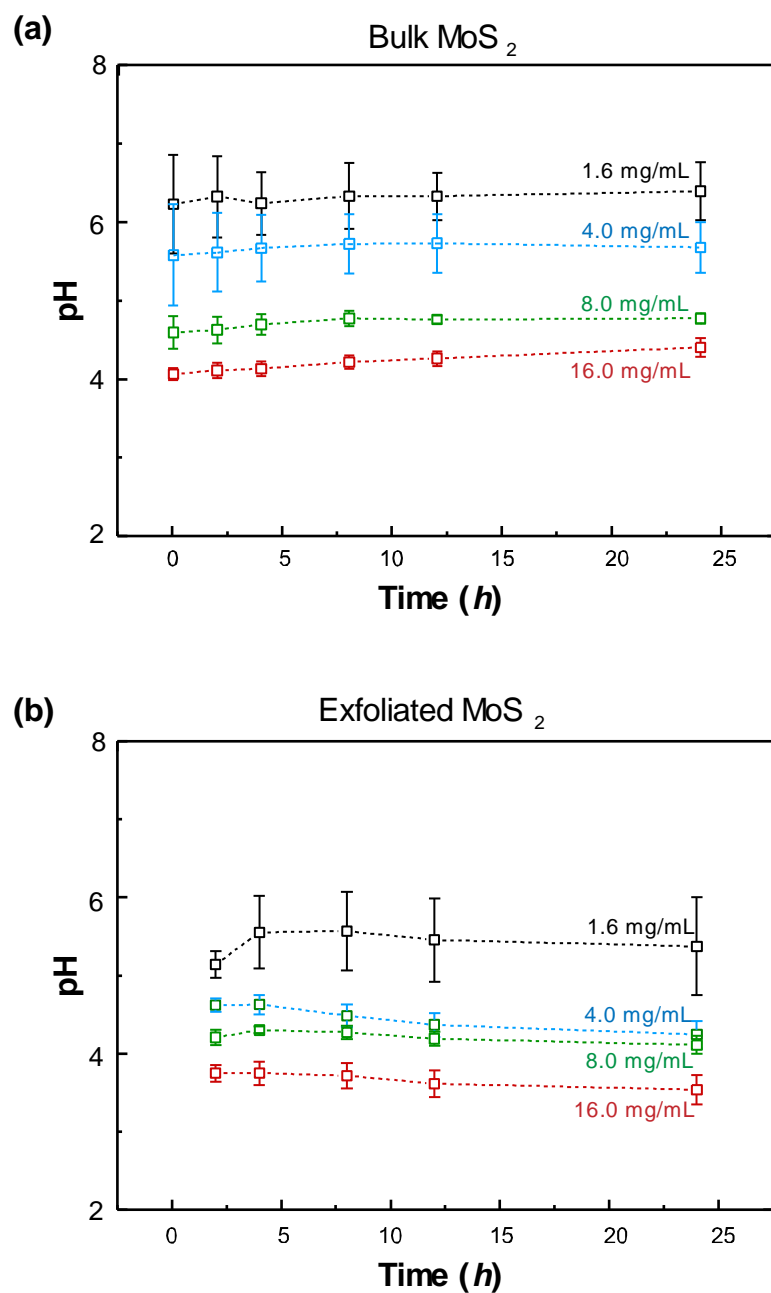

**Figure S6.** PH measurement for MoS<sub>2</sub> in ultrapurified water stirred with magnetic bar in 24-hour timeline (a) for bulk MoS<sub>2</sub> (b) 1 hour exfoliated MoS<sub>2</sub>. The error bars represent standard deviation from the mean.

**Table S1.** Starting material (MoS<sub>2</sub>) information: **(a)** is a product specification offered from the company. **(b)** is bulk MoS<sub>2</sub> EDX result, **(c)** is exfoliated MoS<sub>2</sub> EDX result with freeze dried powder from the sample solution. This X-ray spectroscopy data was measured with Field Emission Scanning Electron Microscope (FE-SEM, JEOL JSM-7500F, Jeol USA, Peabody, MA, USA).

(a)

| 41827 Molybdenum(IV) sulfide, 99% (metals basis) |                  |
|--------------------------------------------------|------------------|
| Product Number                                   | 41827            |
| CAS number                                       | 1317-33-5        |
| MDL number                                       | MFCD00003470     |
| Molecular formula                                | MoS <sub>2</sub> |
| Appearance (Color)                               | Gray to black    |
| Form                                             | Powder           |
| Total Metal Impurities                           | ≤ 1%             |
| Particle Size                                    | -325 mesh        |

\* This information is available at this link (<https://alfaesar.com/en/prodspec/041827>)

(b)

| Element | Weight% | Atomic% | Spectrum                                                                             |
|---------|---------|---------|--------------------------------------------------------------------------------------|
| O K     | 0.00    | 0.00    | 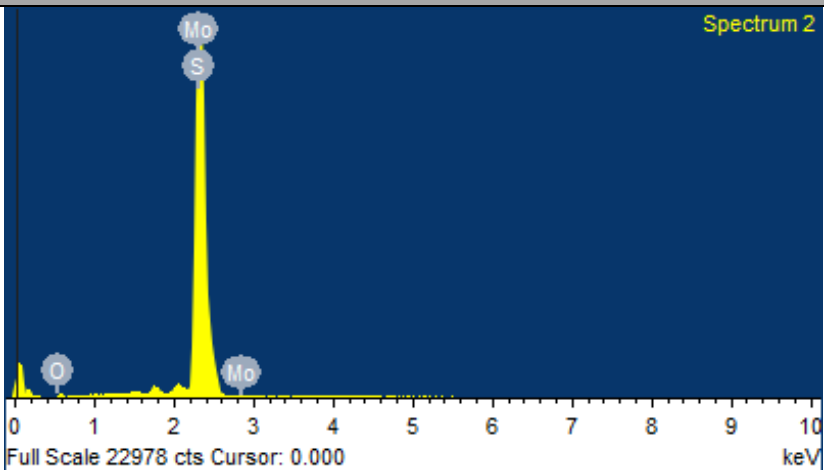 |
| S K     | 33.51   | 60.12   |                                                                                      |
| Mo L    | 66.49   | 39.88   |                                                                                      |
| Totals  | 100.00  |         |                                                                                      |

(c)

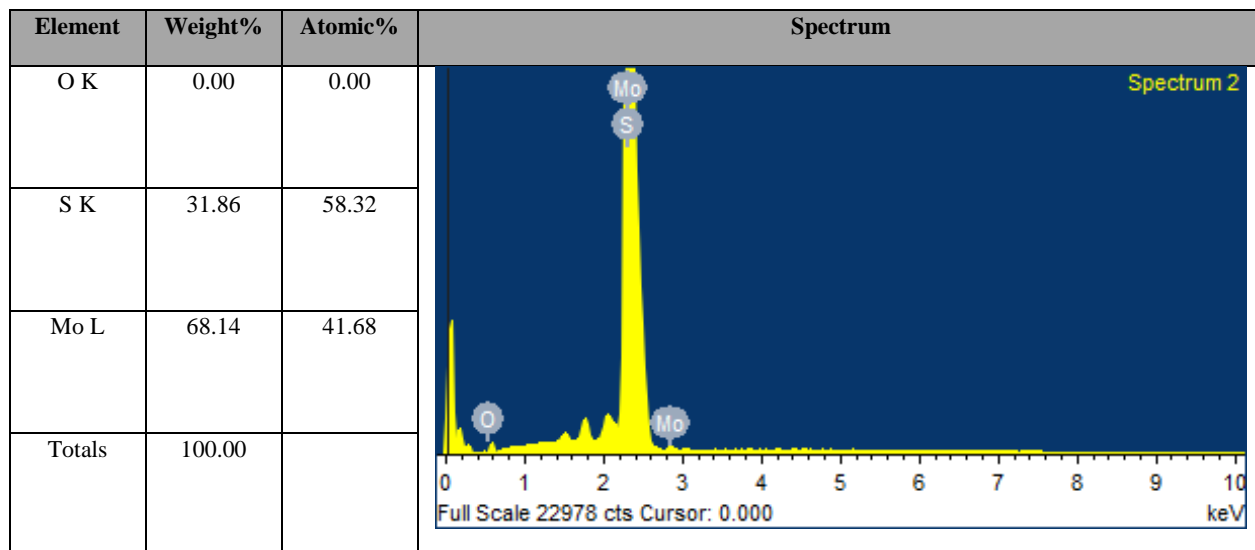

**Table S2.** Statistical data derived from Figure 3-4. **(a)** P values for comparing the survival average per different concentrations for each timeline. The higher the p value is, it implies that the data group are more similar. **(b)** Decreased amount of survival average from bulk MoS<sub>2</sub> condition to 1 hour exfoliated MoS<sub>2</sub> condition

(a)

| P value | <i>B.cereus</i>                                                 | <i>P.aeruginosa</i>                      | Bulk MoS <sub>2</sub>                  | 1 hr exfoliated MoS <sub>2</sub>       |
|---------|-----------------------------------------------------------------|------------------------------------------|----------------------------------------|----------------------------------------|
|         | bulk vs 1 hr exfoliated MoS <sub>2</sub>                        | bulk vs 1 hr exfoliated MoS <sub>2</sub> | <i>B.cereus</i> vs <i>P.aeruginosa</i> | <i>B.cereus</i> vs <i>P.aeruginosa</i> |
| 0hr     | Identical; all data start from 1 at 0hr after the normalization |                                          |                                        |                                        |
| 2hr     | 0.005449                                                        | 0.014493                                 | 0.006341                               | 0.00989                                |
| 4hr     | 0.00048                                                         | 0.001023                                 | 0.000196                               | 0.009816                               |
| 8hr     | 0.000625                                                        | 0.003851                                 | 0.003873                               | 0.027004                               |
| 12hr    | 0.007226                                                        | 0.002205                                 | 0.017038                               | 0.090325                               |
| 24hr    | 0.001784                                                        | 0.002404                                 | 0.039466                               | 0.073406                               |



(b)

| Subtraction of normalized survival average at bulk MoS <sub>2</sub> and exfoliated MoS <sub>2</sub> | Concentration of the MoS <sub>2</sub> | 0hr (identical; all data start from 1 at 0hr after the normalization) | 2hr  | 4hr  | 8hr  | 12hr | 24hr |
|-----------------------------------------------------------------------------------------------------|---------------------------------------|-----------------------------------------------------------------------|------|------|------|------|------|
| <i>B.cereus</i>                                                                                     | 1.6 mg/mL                             | 0.00                                                                  | 0.00 | 0.44 | 0.43 | 0.61 | 0.31 |
|                                                                                                     | 4.0 mg/mL                             | 0.00                                                                  | 0.05 | 0.52 | 0.31 | 0.32 | 0.07 |
|                                                                                                     | 8.0 mg/mL                             | 0.00                                                                  | 0.51 | 0.27 | 0.05 | 0.03 | 0.01 |
|                                                                                                     | 16.0 mg/mL                            | 0.00                                                                  | 0.30 | 0.23 | 0.07 | 0.04 | 0.00 |
| <i>P.aeruginosa</i>                                                                                 | 1.6 mg/mL                             | 0.00                                                                  | 0.03 | 0.07 | 0.16 | 0.19 | 0.22 |
|                                                                                                     | 4.0 mg/mL                             | 0.00                                                                  | 0.39 | 0.31 | 0.06 | 0.00 | 0.01 |
|                                                                                                     | 8.0 mg/mL                             | 0.00                                                                  | 0.08 | 0.05 | 0.06 | 0.01 | 0.01 |
|                                                                                                     | 16.0 mg/mL                            | 0.00                                                                  | 0.18 | 0.08 | 0.07 | 0.05 | 0.01 |

**Table S3.** Calculated data table from 8hr dose response curve fitting. The  $\pm$  values are standard errors calculated by ORIGIN PRO 8.

| 8hr Dose Response curve fitting data                      | min | max | $\log_{10}(x_0)$ | slope           | EC20            | EC50            | EC80            |
|-----------------------------------------------------------|-----|-----|------------------|-----------------|-----------------|-----------------|-----------------|
| <i>B.cereus</i> with bulk MoS <sub>2</sub>                | 0   | 100 | $0.26 \pm 0.10$  | $3.58 \pm 0.65$ | $1.23 \pm 0.36$ | $1.81 \pm 0.41$ | $2.66 \pm 0.46$ |
| <i>B.cereus</i> with 1 hr exfoliated MoS <sub>2</sub>     |     |     | $0.16 \pm 0.06$  | $4.24 \pm 0.32$ | $1.04 \pm 0.16$ | $1.45 \pm 0.19$ | $2.01 \pm 0.23$ |
| <i>P.aeruginosa</i> with bulk MoS <sub>2</sub>            |     |     | $0.00 \pm 0.19$  | $2.64 \pm 0.84$ | $0.59 \pm 0.35$ | $1.00 \pm 0.43$ | $1.69 \pm 0.45$ |
| <i>P.aeruginosa</i> with 1 hr exfoliated MoS <sub>2</sub> |     |     | $-0.23 \pm 0.12$ | $3.36 \pm 0.60$ | $0.39 \pm 0.13$ | $0.59 \pm 0.16$ | $0.89 \pm 0.19$ |
